# Supplementary material
Source: PubMed Central journal article supplement (PMC8340152)
Supplement: ajtr0013-8480-f8.pdf [file ajtr0013-8480-f8.pdf]

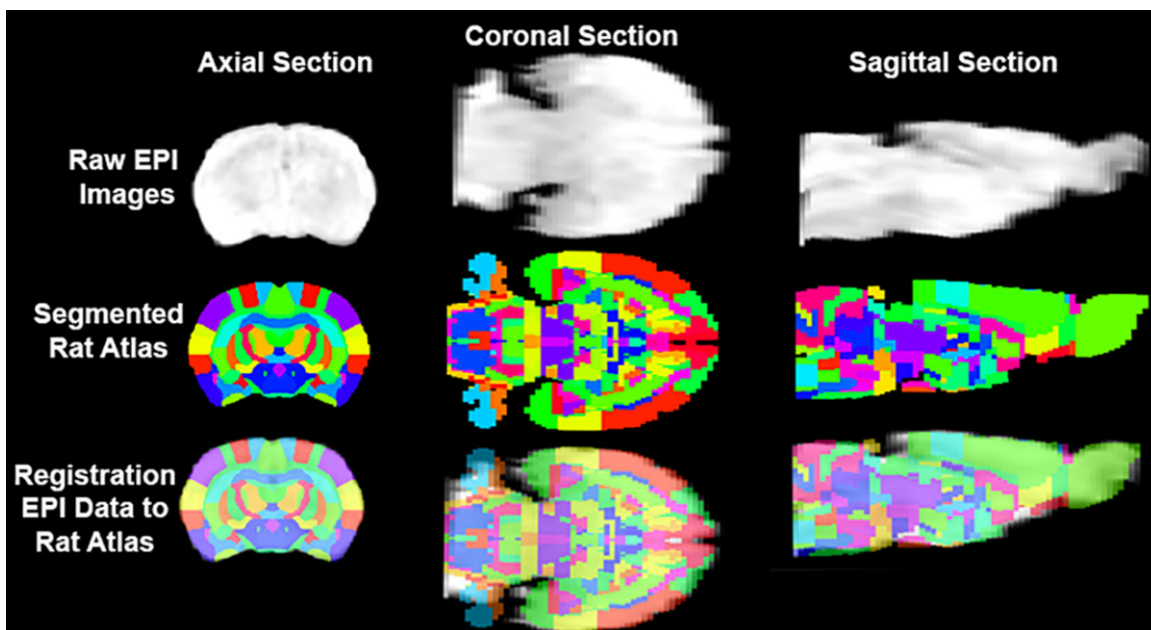

**Figure S1.** Neuroanatomical Fidelity. Shown are raw EPI images in different orthogonal directions and their registration of the segmented rat atlas.
